# Supplementary material for: Bio-Based and Robust Polydopamine Coated Nanocellulose/Amyloid Composite Aerogel for Fast and Wide-Spectrum Water Purification
Source: MDPI journal article supplement (doi:10.3390/polym13193442), 2021-10-07
Supplement: s1 [file s1]

Supplementary Material

# Bio-Based and Robust Polydopamine Coated Nanocellulose/ Amyloid Composite Aerogel for Fast and Wide-Spectrum Water Purification

Maxime Sorriaux <sup>1,2</sup>, Mathias Sorieul <sup>1</sup> and Yi Chen <sup>1,\*</sup>

<sup>1</sup> Scion, 49 Sala Street, Private Bag 3020, Rotorua 3046, New Zealand

<sup>2</sup> Physico-chimie des Electrolytes et Nanosystèmes Interfaciaux (PHENIX), Sorbonne Université, CNRS, 75005, Paris, France; maxime.sorriaux@sorbonne-universite.fr (M.S.); Mathias.Sorieul@scionresearch.com (M.S.)

\* Correspondence: yi.chen@scionresearch.com

**Table S1.** Source materials used for the CpA aerogel synthesis and the adsorption experiments.

| Chemical                     | Company          |
|------------------------------|------------------|
| cellulose nanofibrils (3 w%) | American process |
| amyloid fibrils (6 wt %)     | Hi-Aspect Ltd.   |
| dopamine hydrochloride       | Sigma–Aldrich    |
| sodium periodate             | Sigma–Aldrich    |
| sodium hydroxide             | Sigma–Aldrich    |
| nitric acid (60%)            | Sigma–Aldrich    |
| Trizma base buffer           | Sigma–Aldrich    |
| copper sulphate              | Sigma–Aldrich    |
| lead nitrate                 | Sigma–Aldrich    |
| Rhodamine Blue (RB)          | Sigma–Aldrich    |
| Malachite Green (MG)         | Sigma–Aldrich    |
| Cristal Violet (CV)          | Sigma–Aldrich    |
| Acid Fuchsin (AF)            | Sigma–Aldrich    |
| Methyl Orange (MO)           | Sigma–Aldrich    |
| Acridine (AC)                | Sigma–Aldrich    |
| Atrazine                     | Ici crop care    |
| Bisphenol A                  | Sigma–Aldrich    |
| Ibuprofen                    | Sigma–Aldrich    |

**Citation:** Sorriaux, M.; Sorieul, M.; Chen, Y. Bio-Based and Robust Polydopamine Coated Nanocellulose/ Amyloid Composite Aerogel for Fast and Wide-Spectrum Water Purification. *Polymers* **2021**, *13*, 3442. <https://doi.org/10.3390/polym13193442>

Academic Editors: Hyun Chan Kim and Lindong Zhai

Received: 14 September 2021

Accepted: 4 October 2021

Published: 7 October 2021

**Publisher's Note:** MDPI stays neutral with regard to jurisdictional claims in published maps and institutional affiliations.

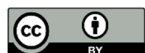

**Copyright:** © 2021 by the authors. Licensee MDPI, Basel, Switzerland. This article is an open access article distributed under the terms and conditions of the Creative Commons Attribution (CC BY) license (<http://creativecommons.org/licenses/by/4.0/>).

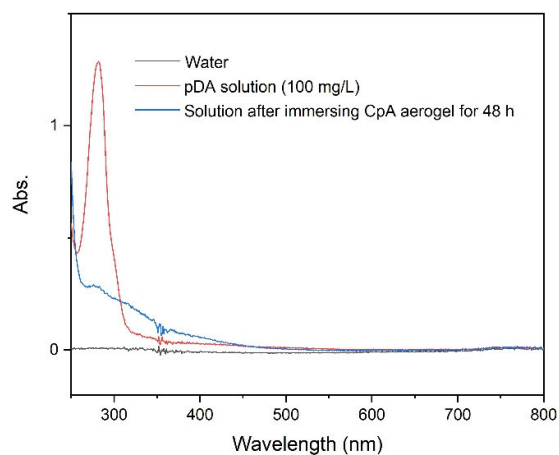

**Figure S1.** UV-visible spectrum of pure water, pDA solution and the solution after immersing CpA aerogel for 48 h. .

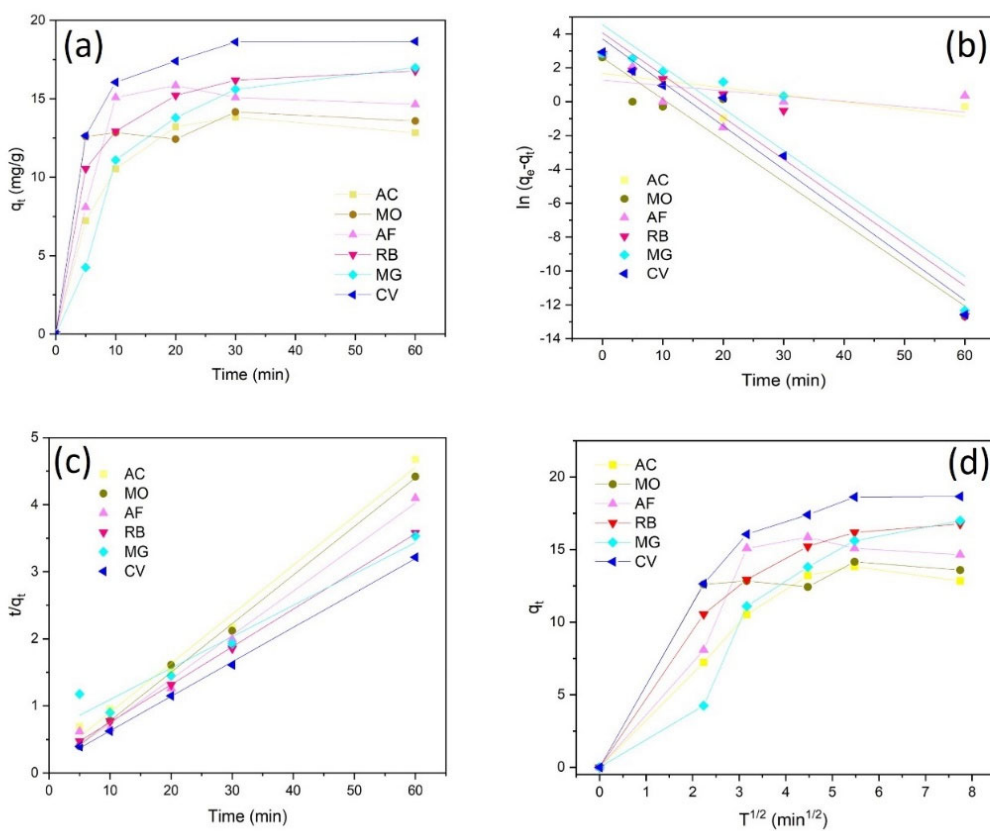

**Figure S2.** (a) Adsorption capability of dyes by the CpA aerogel in function of time. (b) The pseudo-first-order kinetic model fitting curve of dyes on the aerogel. (c) The pseudo-second-order kinetic model fitting curve of dyes on the aerogel. (d) Intra-particle diffusion model for dyes onto the aerogel.

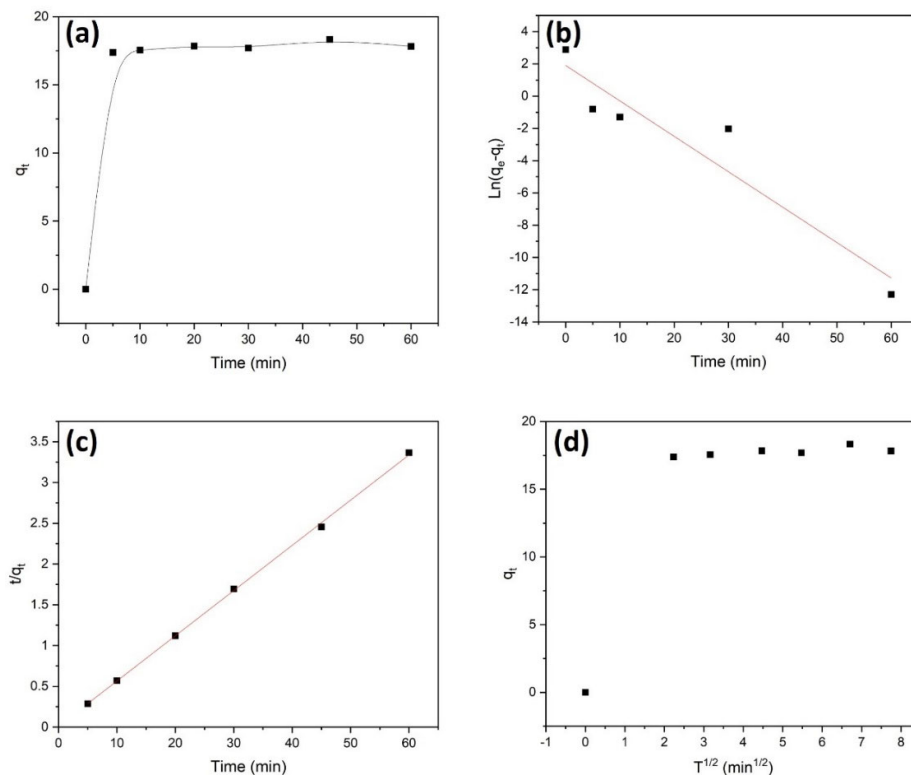

**Figure S3.** (a) Adsorption capability of Pb(II) ions by CpA aerogel in function of time. (b) The pseudo-first-order kinetic model fitting curve of Pb(II) ions on the aerogel. (c) The pseudo-second-order kinetic model fitting curve of Pb(II) ions on the aerogel. (d) Intra-particle diffusion model for Pb(II) ions onto the aerogel.

**Table S2.** Density and porosity of freeze dried CpA aerogels from freezing at different temperatures.

| Frozen temperature (°C) | Density <sup>3</sup> (mg/cm <sup>3</sup> ) | Porosity (%) |
|-------------------------|--------------------------------------------|--------------|
| -80                     | 76.024                                     | 90.056       |
| -196 (liquid nitrogen)  | 67.900                                     | 91.119       |

**Table S3.** Parameters of the pseudo-first-order and pseudo-second-order models for organics adsorption on the aerogel.

|             | $q_e$ (experimental) |                            | $R^2$    | $q_e$  | $k_1$    |
|-------------|----------------------|----------------------------|----------|--------|----------|
| Atrazine    | 0.0360               | $y = -0.10899x - 5.121$    | -0.15393 |        |          |
| Bisphenol A | 0.0958               | $y = -0.14667x - 3.47869$  | 0.39084  |        |          |
| Ibuprofen   | 0.0823               | $y = -0.1541x - 3.88557$   | 0.27801  |        |          |
|             | $q_e$ (experimental) |                            | $R^2$    | $q_e$  | $k_2$    |
| Atrazine    | 0.0360               | $y = 27.61217x + 13.47533$ | 0.99924  | 0.0362 | 763.1024 |
| Bisphenol A | 0.0958               | $y = 10.35315x + 5.36855$  | 0.99990  | 0.0965 | 107.3854 |
| Ibuprofen   | 0.0823               | $y = 12.09586x + 4.00989$  | 0.99994  | 0.0827 | 146.214  |

**Table S4.** Parameters of the pseudo-first-order model for dyes adsorption on the aerogel.

|    | $q_e$ (experimental) |                       | $R^2$    | $q_e$    | $k_1$   |
|----|----------------------|-----------------------|----------|----------|---------|
| AC | 13.5826              | $y=-0.04242x+1.66581$ | 0.29719  | 5.2900   | 0.04242 |
| MO | 13.5803              | $y=-0.2443x+2.59156$  | 0.92344  | 13.3506  | 0.2443  |
| AF | 16.0656              | $y=-0.03126x+1.25976$ | -0.00834 | 3.52458  | 0.03126 |
| RB | 16.7677              | $Y=-0.24896x+4.06284$ | 0.88097  | 58.1391  | 0.24896 |
| MG | 16.9858              | $y=-0.24773x+5.54571$ | 0.84890  | 256.1364 | 0.24773 |
| CV | 18.6585              | $y=-0.25706x+3.70838$ | 0.96057  | 40.7877  | 0.25706 |

**Table S5.** Parameters of the pseudo-second-order model for dyes adsorption on the aerogel.

|    | $q_e$ (experimental) |                      | $R^2$   | $q_e$   | $k_2$  |
|----|----------------------|----------------------|---------|---------|--------|
| AC | 13.5826              | $y=0.07306x+0.17344$ | 0.98796 | 13.6874 | 0.0308 |
| MO | 13.5803              | $y=0.0724x+0.05448$  | 0.99684 | 13.8122 | 0.0962 |
| AF | 16.0656              | $y=0.06564x+0.08484$ | 0.9877  | 15.2346 | 0.0508 |
| RB | 16.7677              | $y=0.05624x+0.19296$ | 0.99975 | 17.7809 | 0.0134 |
| MG | 16.9858              | $y=0.04681x+0.62618$ | 0.94479 | 21.3629 | 0.0035 |
| CV | 18.6585              | $y=0.05137X+0.11468$ | 0.99921 | 19.4666 | 0.0230 |

**Table S6.** Parameters of the pseudo-first-order and pseudo-second-order models for Pb(II) ions adsorption on the aerogel.

|                     | $q_e$ (experimental) |                       | $R^2$   | $q_e$   | $k_1$   |
|---------------------|----------------------|-----------------------|---------|---------|---------|
| pseudo-first-order  | 17.8254              | $y=-0.94984x+1.90089$ | 0.86961 | 6.6918  | 0.94984 |
|                     | $q_e$ (experimental) |                       | $R^2$   | $q_e$   | $k_2$   |
| pseudo-second-order | 17.8254              | $y=0.05545x+0.01146$  | 0.9993  | 18.0342 | 0.0031  |
